# Supplementary material
Source: PubMed Central journal article supplement (PMC3826354)
Supplement: supp_122072_chronic-akbaraly-1-at.pdf [file supp_122072_chronic-akbaraly-1-at.pdf]

**Appendix 1:** Schematic model of the relationships between inflammation and age-related chronic diseases.

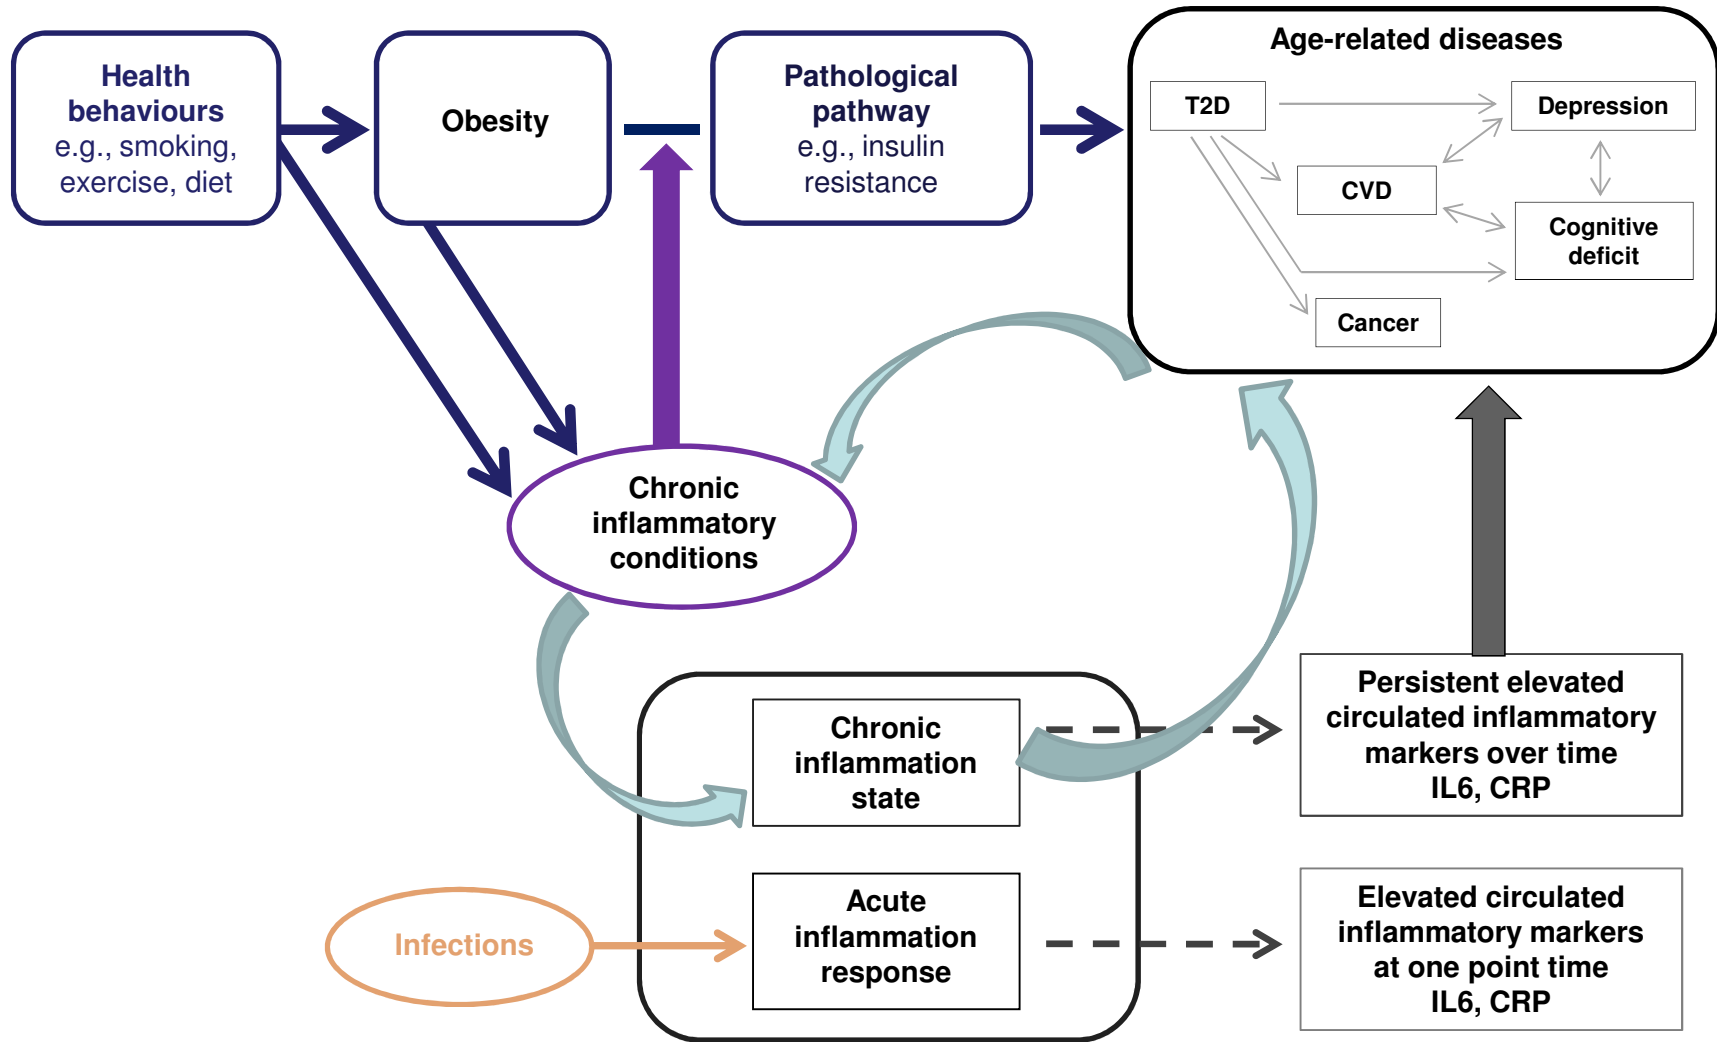

T2D = type 2 diabetes; CVD = cardiovascular disease; IL6 = interleukin-6; CRP = C-reactive protein.
