# Supplementary material
Source: PubMed Central journal article supplement (PMC3826354)
Supplement: supp_122072_chronic-akbaraly-4-at.pdf [file supp_122072_chronic-akbaraly-4-at.pdf]

**A: CRP level at baseline**

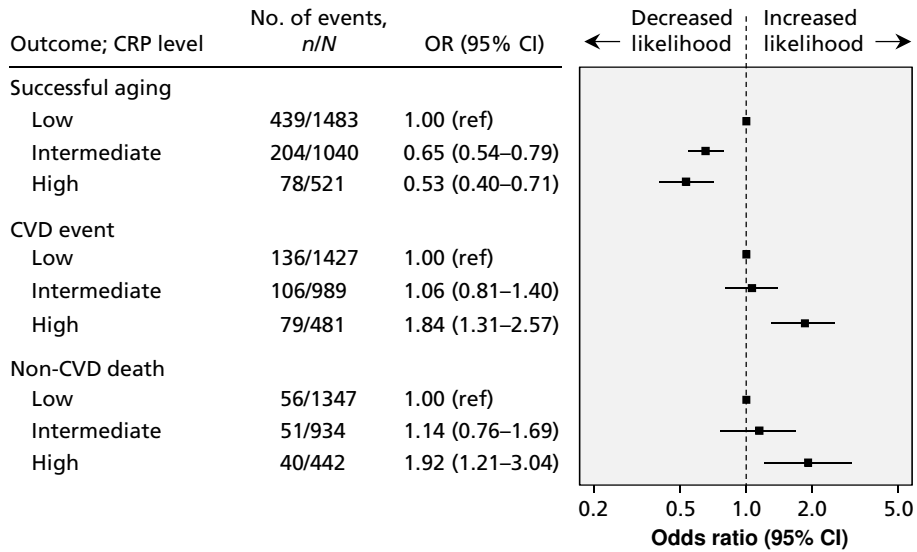

**B: CRP level over 5-yr exposure period**

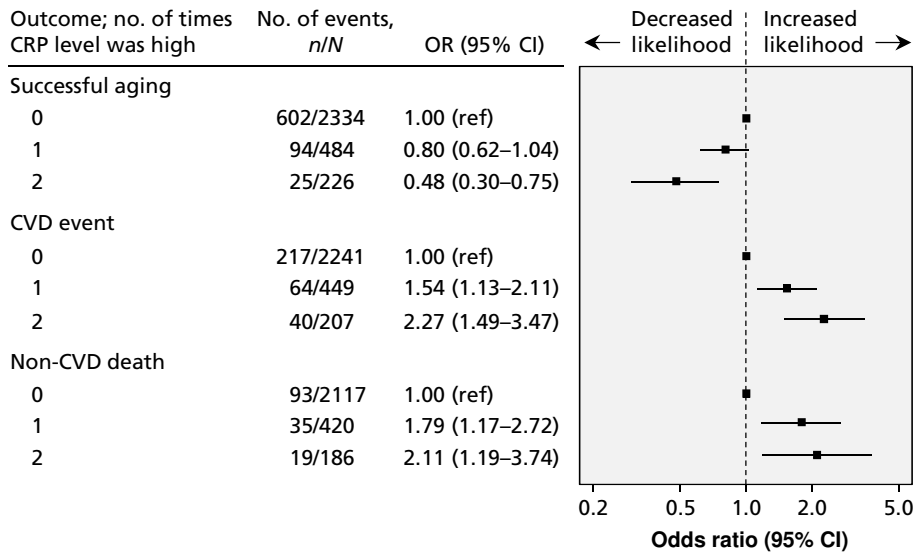

**Appendix 4:** Multivariable logistic regression of associations between C-reactive protein (CRP) levels at baseline (A) and over a 5-year exposure period (B) and subsequent aging phenotypes at 10-year follow-up. Aging phenotypes were: successful aging (v. normal aging, cardiovascular disease [CVD] event and non-CVD death phenotypes combined), total  $n = 3044$ ; CVD event (v. successful and normal aging phenotypes combined), total  $n = 2897$  (excludes 147 participants who died of non-CVD causes); and non-CVD death (v. successful and normal aging phenotypes combined), total  $n = 2723$  (excludes 321 participants who had fatal or nonfatal CVD event). For model A, CRP levels were separated into 3 categories: low ( $< 1$  mg/L), intermediate (1–3 mg/L) and high ( $> 3$  mg/L). For model B, CRP was measured twice (5 yr before baseline and at baseline); 0 = neither measurement was high, 1 = either measurement was high, 2 = both measurements were high. Odds ratios (ORs) were adjusted for sex, age, socioeconomic status, smoking status, physical activity, acute inflammation and use of anti-inflammatory drugs. Values greater than 1.0 indicated an increased likelihood of the outcome. CI = confidence interval, ref = reference group.
