# Supplementary material
Source: PubMed Central journal article supplement (PMC3826354)
Supplement: supp_122072_chronic-akbaraly-7-at.pdf [file supp_122072_chronic-akbaraly-7-at.pdf]

**Appendix 7:** Computation of net reclassification improvement statistics characterizing the difference in predictive ability when inflammation was assessed using 2 measures (model 2) versus one measure (model 1)

|                                                                                        | Successful aging,<br><i>n</i> = 721 | Fatal or nonfatal CVD<br>events, <i>n</i> = 321 | Non-CVD death,<br><i>n</i> = 147 |       |                   |                |       |                   |                |
|----------------------------------------------------------------------------------------|-------------------------------------|-------------------------------------------------|----------------------------------|-------|-------------------|----------------|-------|-------------------|----------------|
|                                                                                        | OR (95% CI)                         | OR (95% CI)                                     | OR (95% CI)                      |       |                   |                |       |                   |                |
| <b>Model 1: Interleukin-6 assessed at baseline</b>                                     |                                     |                                                 |                                  |       |                   |                |       |                   |                |
| Low                                                                                    | 1.00 (ref)                          | 1.00 (ref)                                      | 1.00 (ref)                       |       |                   |                |       |                   |                |
| Intermediate                                                                           | 0.70 (0.58–0.86)                    | 1.41 (1.00–1.99)                                | 1.33 (0.78–2.28)                 |       |                   |                |       |                   |                |
| High                                                                                   | 0.45 (0.35–0.59)                    | 1.76 (1.21–2.55)                                | 2.64 (1.53–4.55)                 |       |                   |                |       |                   |                |
| <b>Model 2: Interleukin-6 assessed 5-yr before baseline and at baseline</b>            |                                     |                                                 |                                  |       |                   |                |       |                   |                |
| Interleukin-6 assessed<br>5-yr before baseline                                         |                                     |                                                 |                                  |       |                   |                |       |                   |                |
| Low                                                                                    | 1.00 (ref)                          | 1.00 (ref)                                      | 1.00 (ref)                       |       |                   |                |       |                   |                |
| Intermediate                                                                           | 0.67 (0.55–0.83)                    | 1.39 (0.98–1.97)                                | 1.62 (0.91–3.06)                 |       |                   |                |       |                   |                |
| High                                                                                   | 0.65 (0.49–0.85)                    | 1.73 (1.16–2.58)                                | 1.67 (0.95–2.79)                 |       |                   |                |       |                   |                |
| Interleukin-6 assessed<br>at baseline                                                  |                                     |                                                 |                                  |       |                   |                |       |                   |                |
| Low                                                                                    | 1.00 (ref)                          | 1.00 (ref)                                      | 1.00 (ref)                       |       |                   |                |       |                   |                |
| Intermediate                                                                           | 0.79 (0.64–0.97)                    | 1.28 (0.90–1.81)                                | 1.18 (0.67–2.05)                 |       |                   |                |       |                   |                |
| High                                                                                   | 0.53 (0.41–0.71)                    | 1.46 (0.98–2.17)                                | 2.24 (1.26–3.98)                 |       |                   |                |       |                   |                |
| <b>Net reclassification<br/>improvement (NRI)<br/>between model 1<br/>and model 2*</b> | NRI                                 | Standard<br>error                               | <i>p</i> value                   | NRI†  | Standard<br>error | <i>p</i> value | NRI†  | Standard<br>error | <i>p</i> value |
|                                                                                        | 0.236                               | 0.040                                           | < 0.001                          | 0.154 | 0.058             | 0.009          | 0.221 | 0.062             | 0.009          |

Note: CI = confidence interval, CVD = cardiovascular, OR = odds ratio.

Analyses assessed the associations of inflammation with: (1) successful aging (v. non-cases: normal aging phenotype, CVD events and non-CVD death phenotypes combined), total *n* = 3044; (2) CVD events (non-cases: successful and normal aging phenotypes combined), total *n* = 2897 (the 147 participants with non-CVD death were excluded); (3) non-CVD death (non-cases: successful and normal aging phenotypes combined), total *n* = 2723 (the 321 participants with a CVD event were excluded). Models were adjusted for sex, age, socioeconomic status, smoking status, physical activity, acute inflammation and use of anti-inflammatory drugs.

\*Calculation of the NRI statistics<sup>1,2</sup> provides the difference in predictive ability when inflammation was assessed using 2 Interleukin-6 measurements (both 5-yr before baseline and at baseline) versus one Interleukin-6 measurement (at baseline) by comparing the predicted risk levels among participants who developed a specific aging phenotype and those who did not.

**References**

1. Pencina MJ, D'Agostino RB Sr, D'Agostino RB Jr, et al. Evaluating the added predictive ability of a new marker: from area under the ROC curve to reclassification and beyond. *Stat Med* 2008;27:157-72.
2. Pencina MJ, D'Agostino RB Sr, Steyerberg EW. Extensions of net reclassification improvement calculations to measure usefulness of new biomarkers. *Stat Med* 2011;30:11-21.
